# Supplementary material for: A biologically plausible mechanism for neuronal coding organized by the phase of alpha oscillations
Source: PubMed Central journal article supplement — Eur J Neurosci. 2016 Jul 18;44(4):2147–61. doi: 10.1111/ejn.13318 (PMC5129495; doi:10.1111/ejn.13318), 2016-07-18
Supplement: EJN-44-2147-s001.pdf [file EJN-44-2147-s001.pdf]

## Supplementary Information

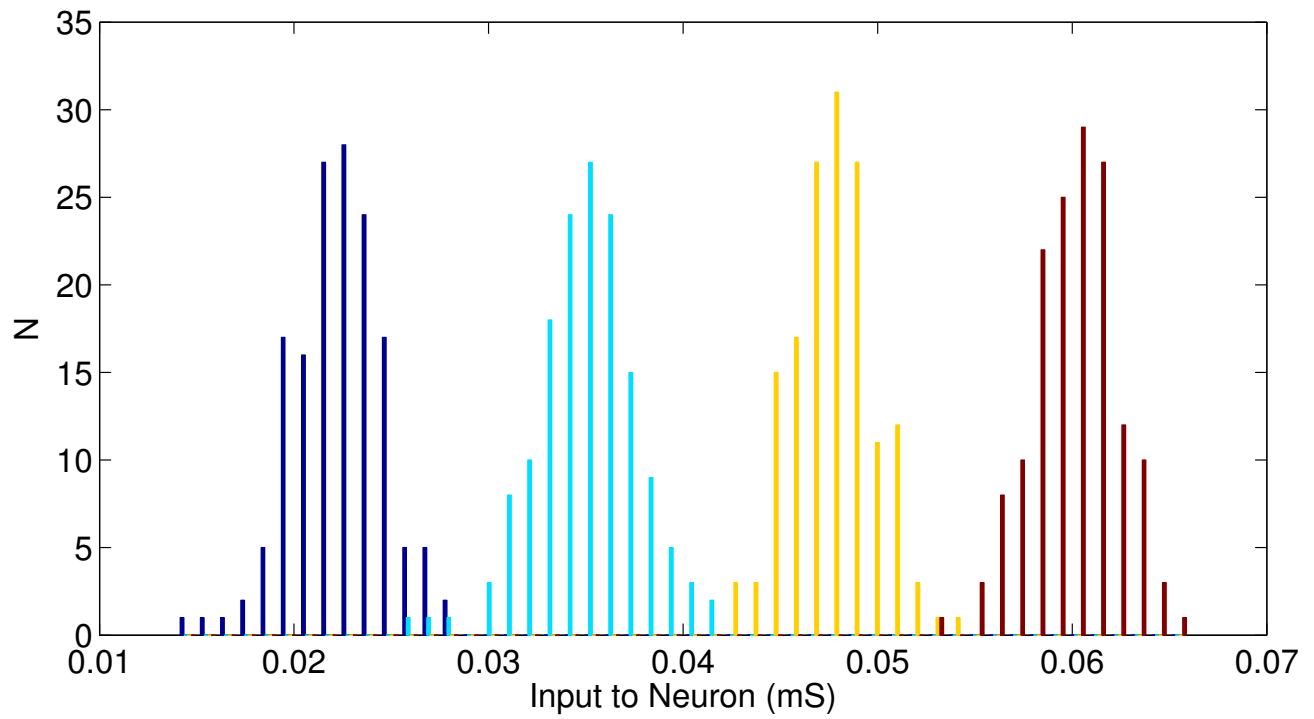

S 1 Fig. Histograms showing the conductance values for the four “spotlights” of imposed AMPA current to the excitatory neurons(see Fig 2B).

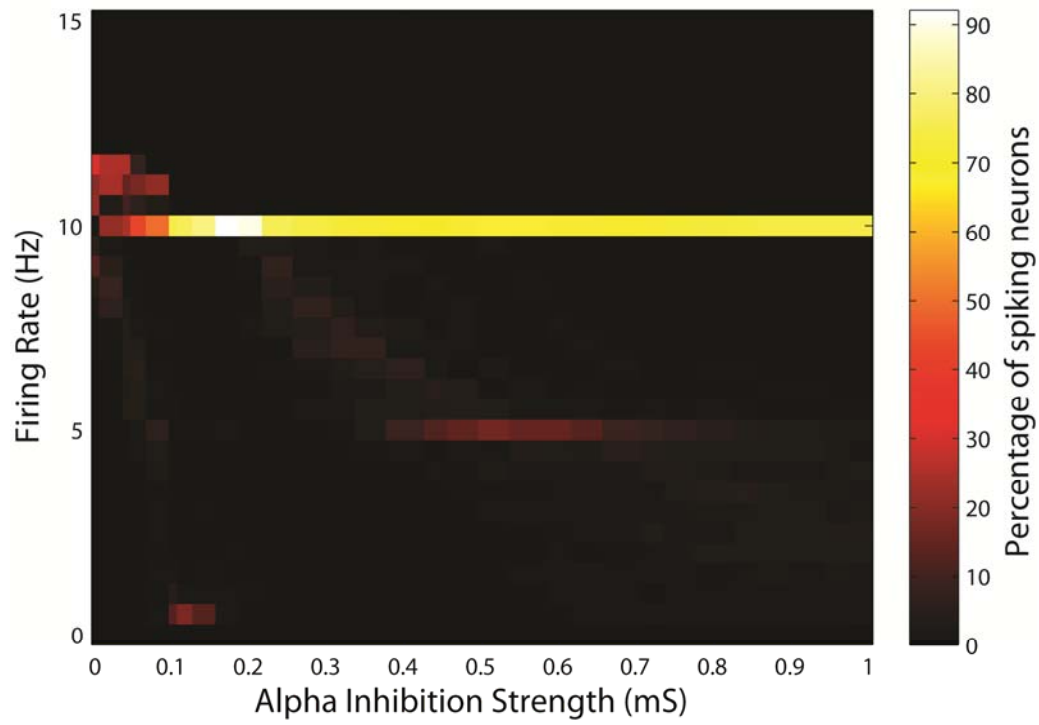

**S 2 Fig.** Firing rate histogram as a function of alpha inhibition strength for all neurons that actually spike during the 2 second stimulation.

Note the subset of neurons that fire at 5 Hz in simulations with alpha inhibition strength between 0.4 mS and 0.6 mS.

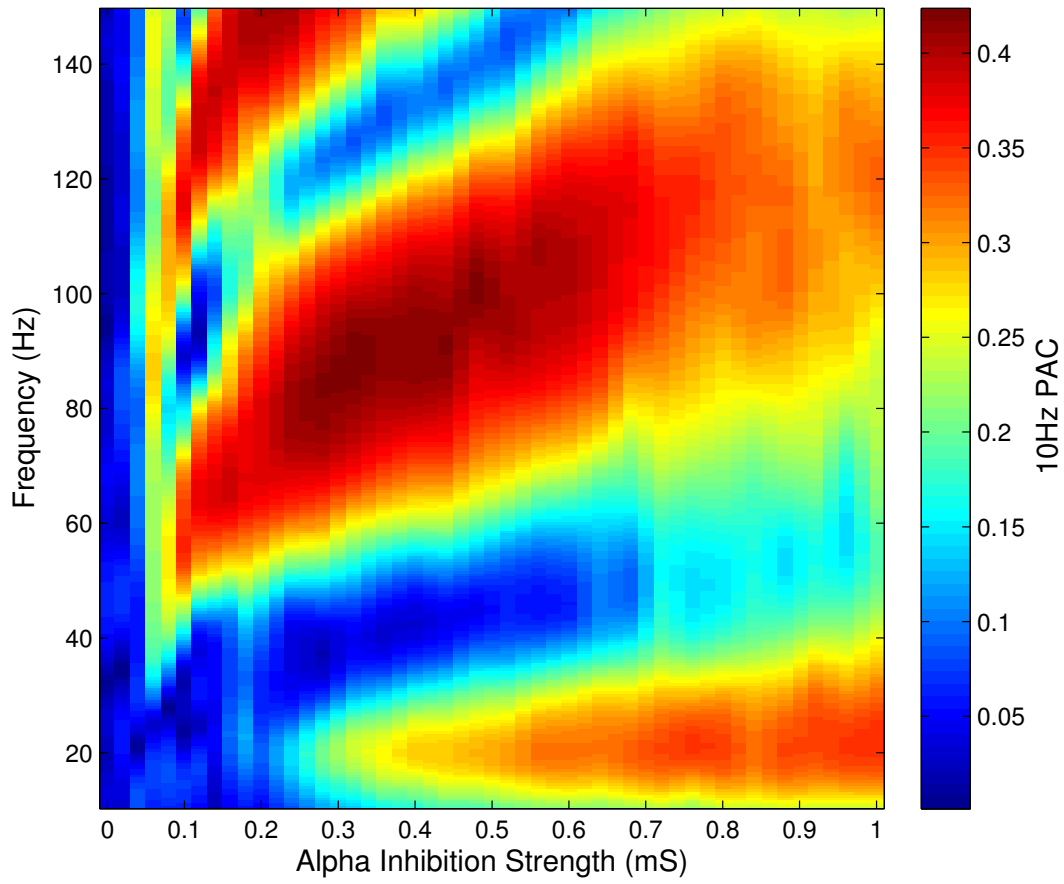

**S 3 Fig.** Amplitude coupling to 10 Hz phase for different alpha inhibition strengths after Gaussian white noise was added to the simulated LFPs netting a signal to noise ratio of 0.5.

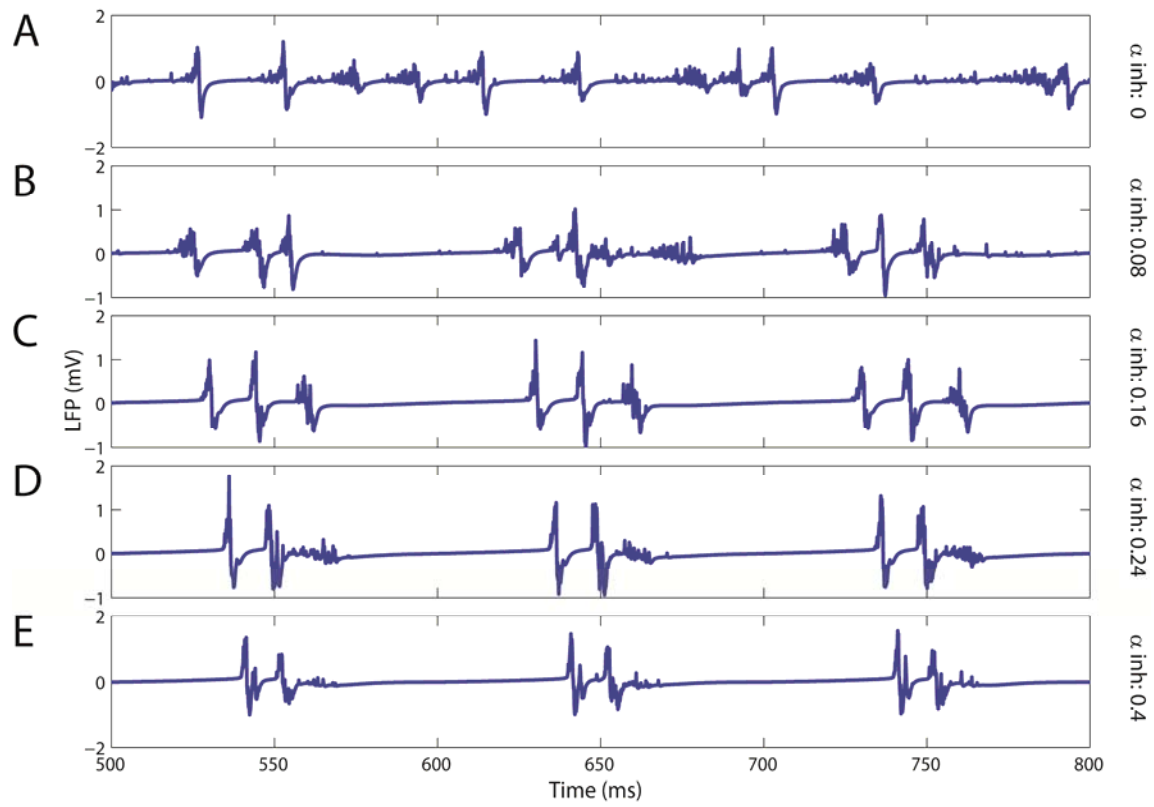

**S 4 Fig.** Examples of the simulated LFP for different alpha strengths (0, 0.08, 0.16, 0.24 and 0.4 mS for A-E respectively)
